# Supplementary material for: Genetic variants associated with glaucomatous visual field loss in primary open-angle glaucoma
Source: PubMed Central journal article supplement (PMC9715669; doi:10.1038/s41598-022-24915-x), 2022-12-01
Supplement: 41598_2022_24915_MOESM1_ESM.pdf [file 41598_2022_24915_MOESM1_ESM.pdf]

| Independent variables                                               | Beta <sup>†</sup> (95% CI)      | SE             | P value         |
|---------------------------------------------------------------------|---------------------------------|----------------|-----------------|
| Age, years                                                          | -0.17 to -0.16 (-0.22 to -0.11) | 0.027 to 0.028 | P<0.001         |
| Male sex                                                            | -2.00 to -1.91 (-3.47 to -0.45) | 0.74 to 0.75   | 0.0080 to 0.011 |
| Weighted <sup>§</sup> GRS of 5 optic nerve-related genetic variants | -0.13 (-0.37 to 0.12)           | 0.12           | 0.31            |
| Weighted <sup>§</sup> GRS of 17 IOP-related genetic variants        | -0.19 (-0.32 to -0.054)         | 0.067          | 0.0058          |

**Supplementary Table S1.** Results of a Multiple Linear Regression Analysis with Mean Deviation of Automated Static Perimetry\* in the Worse Eye as a Dependent Variable in Patients with Primary Open-angle Glaucoma. CI: confidence interval, SE: standard error, GRS: genetic risk score, IOP: intraocular pressure. \*Humphrey field analyzer 30-2 (HFA30-2), <sup>†</sup>Regression coefficient, <sup>§</sup>The risk (odds ratio) of high tension glaucoma for the risk allele of each genetic variant was calculated using a logistic linear regression analysis, and the sum of the logarithmically-converted odds ratios of these genetic variants was used as a weighted GRS. F change=13.5 to 15.9, P<0.001.

| Independent variables                                               | Beta <sup>†</sup> (95% CI)         | SE             | P value       |
|---------------------------------------------------------------------|------------------------------------|----------------|---------------|
| Age, years                                                          | -0.025 to -0.015 (-0.068 to 0.028) | 0.021 to 0.027 | 0.24 to 0.50  |
| Male sex                                                            | -1.06 to -0.68 (-2.19 to 0.45)     | 0.57           | 0.064 to 0.24 |
| Weighted <sup>§</sup> GRS of 5 optic nerve-related genetic variants | 0.23 (0.049 to 0.40)               | 0.089          | 0.013         |
| Weighted <sup>§</sup> GRS of 17 IOP-related genetic variants        | 0.046 (-0.047 to 0.14)             | 0.047          | 0.33          |

**Supplementary Table S2.** Results of a Multiple Linear Regression Analysis with Pattern Standard Deviation of Automated Static Perimetry\* in the Worse Eye as a Dependent Variable in Patients with Primary Open-angle Glaucoma. CI: confidence interval, SE: standard error, GRS: genetic risk score, IOP: intraocular pressure. \*Humphrey field analyzer 30-2 (HFA30-2), <sup>†</sup>Regression coefficient, <sup>§</sup>The risk (odds ratio) of high tension glaucoma for the risk allele of each genetic variant was calculated using a logistic linear regression analysis, and the sum of the logarithmically-converted odds ratios of these genetic variants was used as a weighted GRS. F change=0.94 to 2.8, P=0.044 to 0.42.
